# Supplementary material for: Impact of systemic lupus erythematosus on cardiovascular morphologic and functional phenotypes: a Mendelian randomization analysis
Source: Front Cardiovasc Med. 2024 Oct 3;11:1454645. doi: 10.3389/fcvm.2024.1454645 (PMC11484247; doi:10.3389/fcvm.2024.1454645)
Supplement: Supplementary file 1 [file Table1.xlsx]

## Sheet: Supplementary Table S1
Supplementary Table S1. Information of included CMR traits
ID	Full Name	Name	Repo	Category	Short	Source
1	Left ventricular end-diastolic volume (mL)	LVEDV	0.91445	left ventricle	LV	Zhao et al. (2023)
2	Left ventricular end-systolic volume (mL)	LVESV	0.866984	left ventricle	LV	Zhao et al. (2023)
3	Left ventricular stroke volume (mL)	LVSV	0.788949	left ventricle	LV	Zhao et al. (2023)
4	Left ventricular ejection fraction (%)	LVEF	0.537393	left ventricle	LV	Zhao et al. (2023)
5	Left ventricular cardiac output (L/min)	LVCO	0.657579	left ventricle	LV	Zhao et al. (2023)
6	Left ventricular myocardial mass (g)	LVM	0.961838	left ventricle	LV	Zhao et al. (2023)
7	Right ventricular end-diastolic volume (mL)	RVEDV	0.923521	right ventricle	RV	Zhao et al. (2023)
8	Right ventricular end-systolic volume (mL)	RVESV	0.914755	right ventricle	RV	Zhao et al. (2023)
9	Right ventricular stroke volume (mL)	RVSV	0.804312	right ventricle	RV	Zhao et al. (2023)
10	Right ventricular ejection fraction (%)	RVEF	0.637727	right ventricle	RV	Zhao et al. (2023)
11	Regional myocardial-wall thickness at end-diastole (mm)	WT_AHA_1	0.662384	left ventricle	LV	Zhao et al. (2023)
12	Regional myocardial-wall thickness at end-diastole (mm)	WT_AHA_2	0.450697	left ventricle	LV	Zhao et al. (2023)
13	Regional myocardial-wall thickness at end-diastole (mm)	WT_AHA_3	0.507507	left ventricle	LV	Zhao et al. (2023)
14	Regional myocardial-wall thickness at end-diastole (mm)	WT_AHA_4	0.718285	left ventricle	LV	Zhao et al. (2023)
15	Regional myocardial-wall thickness at end-diastole (mm)	WT_AHA_5	0.826088	left ventricle	LV	Zhao et al. (2023)
16	Regional myocardial-wall thickness at end-diastole (mm)	WT_AHA_6	0.809221	left ventricle	LV	Zhao et al. (2023)
17	Regional myocardial-wall thickness at end-diastole (mm)	WT_AHA_7	0.838488	left ventricle	LV	Zhao et al. (2023)
18	Regional myocardial-wall thickness at end-diastole (mm)	WT_AHA_8	0.826577	left ventricle	LV	Zhao et al. (2023)
19	Regional myocardial-wall thickness at end-diastole (mm)	WT_AHA_9	0.86455	left ventricle	LV	Zhao et al. (2023)
20	Regional myocardial-wall thickness at end-diastole (mm)	WT_AHA_10	0.865375	left ventricle	LV	Zhao et al. (2023)
21	Regional myocardial-wall thickness at end-diastole (mm)	WT_AHA_11	0.864924	left ventricle	LV	Zhao et al. (2023)
22	Regional myocardial-wall thickness at end-diastole (mm)	WT_AHA_12	0.856078	left ventricle	LV	Zhao et al. (2023)
23	Regional myocardial-wall thickness at end-diastole (mm)	WT_AHA_13	0.711251	left ventricle	LV	Zhao et al. (2023)
24	Regional myocardial-wall thickness at end-diastole (mm)	WT_AHA_14	0.739935	left ventricle	LV	Zhao et al. (2023)
25	Regional myocardial-wall thickness at end-diastole (mm)	WT_AHA_15	0.710901	left ventricle	LV	Zhao et al. (2023)
26	Regional myocardial-wall thickness at end-diastole (mm)	WT_AHA_16	0.723329	left ventricle	LV	Zhao et al. (2023)
27	Global myocardial-wall thickness at end-diastole (mm)	WT_global	0.90777	left ventricle	LV	Zhao et al. (2023)
28	Left atrium maximum volume (mL)	LAV_max	0.774007	left atrium	LA	Zhao et al. (2023)
29	Left atrium minimum volume (mL)	LAV_min	0.735362	left atrium	LA	Zhao et al. (2023)
30	Left atrium stroke volume (mL)	LASV	0.729845	left atrium	LA	Zhao et al. (2023)
31	Left atrium ejection fraction (%)	LAEF	0.590547	left atrium	LA	Zhao et al. (2023)
32	Right atrium maximum volume (mL)	RAV_max	0.797313	right atrium	RA	Zhao et al. (2023)
33	Right atrium minimum volume (mL)	RAV_min	0.7955	right atrium	RA	Zhao et al. (2023)
34	Right atrium stroke volume (mL)	RASV	0.617413	right atrium	RA	Zhao et al. (2023)
35	Right atrium ejection fraction (%)	RAEF	0.527555	right atrium	RA	Zhao et al. (2023)
36	Ascending aorta maximum area (mm2)	AAo_max_area	0.965016	ascending aorta	AAo	Zhao et al. (2023)
37	Ascending aorta minimum area (mm2)	AAo_min_area	0.970005	ascending aorta	AAo	Zhao et al. (2023)
38	Ascending aorta distensibility (10-3mmHg-1)	AAo_aortic_distensibility	0.579326	ascending aorta	AAo	Zhao et al. (2023)
39	Descending aorta maximum area (mm2)	DAo_max_area	0.950357	descending aorta	DAo	Zhao et al. (2023)
40	Descending aorta minimum area (mm2)	DAo_min_area	0.947104	descending aorta	DAo	Zhao et al. (2023)
41	Descending aorta distensibility (10-3mmHg-1)	DAo_aortic_distensibility	0.494833	descending aorta	DAo	Zhao et al. (2023)
42	Regional longitudinal strain (%)	Ell_1	0.5289	left ventricle	LV	Zhao et al. (2023)
43	Regional longitudinal strain (%)	Ell_2	0.516644	left ventricle	LV	Zhao et al. (2023)
44	Regional longitudinal strain (%)	Ell_3	0.576433	left ventricle	LV	Zhao et al. (2023)
45	Regional longitudinal strain (%)	Ell_4	0.534166	left ventricle	LV	Zhao et al. (2023)
46	Regional longitudinal strain (%)	Ell_5	0.493779	left ventricle	LV	Zhao et al. (2023)
47	Regional longitudinal strain (%)	Ell_6	0.538507	left ventricle	LV	Zhao et al. (2023)
48	Global longitudinal strain (%)	Ell_global	0.5208	left ventricle	LV	Zhao et al. (2023)
49	Regional peak circumferential strain (%)	Ecc_AHA_1	0.513509	left ventricle	LV	Zhao et al. (2023)
50	Regional peak circumferential strain (%)	Ecc_AHA_2	0.682417	left ventricle	LV	Zhao et al. (2023)
51	Regional peak circumferential strain (%)	Ecc_AHA_3	0.50846	left ventricle	LV	Zhao et al. (2023)
52	Regional peak circumferential strain (%)	Ecc_AHA_4	0.413383	left ventricle	LV	Zhao et al. (2023)
53	Regional peak circumferential strain (%)	Ecc_AHA_5	0.506626	left ventricle	LV	Zhao et al. (2023)
54	Regional peak circumferential strain (%)	Ecc_AHA_6	0.528917	left ventricle	LV	Zhao et al. (2023)
55	Regional peak circumferential strain (%)	Ecc_AHA_7	0.61428	left ventricle	LV	Zhao et al. (2023)
56	Regional peak circumferential strain (%)	Ecc_AHA_8	0.599705	left ventricle	LV	Zhao et al. (2023)
57	Regional peak circumferential strain (%)	Ecc_AHA_9	0.59548	left ventricle	LV	Zhao et al. (2023)
58	Regional peak circumferential strain (%)	Ecc_AHA_10	0.437345	left ventricle	LV	Zhao et al. (2023)
59	Regional peak circumferential strain (%)	Ecc_AHA_11	0.544508	left ventricle	LV	Zhao et al. (2023)
60	Regional peak circumferential strain (%)	Ecc_AHA_12	0.596207	left ventricle	LV	Zhao et al. (2023)
61	Regional peak circumferential strain (%)	Ecc_AHA_13	0.652557	left ventricle	LV	Zhao et al. (2023)
62	Regional peak circumferential strain (%)	Ecc_AHA_14	0.583013	left ventricle	LV	Zhao et al. (2023)
63	Regional peak circumferential strain (%)	Ecc_AHA_15	0.610993	left ventricle	LV	Zhao et al. (2023)
64	Regional peak circumferential strain (%)	Ecc_AHA_16	0.532973	left ventricle	LV	Zhao et al. (2023)
65	Global peak circumferential strain (%)	Ecc_global	0.742095	left ventricle	LV	Zhao et al. (2023)
66	Regional radial strain (%)	Err_AHA_1	0.479474	left ventricle	LV	Zhao et al. (2023)
67	Regional radial strain (%)	Err_AHA_2	0.368929	left ventricle	LV	Zhao et al. (2023)
68	Regional radial strain (%)	Err_AHA_3	0.496803	left ventricle	LV	Zhao et al. (2023)
69	Regional radial strain (%)	Err_AHA_4	0.566715	left ventricle	LV	Zhao et al. (2023)
70	Regional radial strain (%)	Err_AHA_5	0.622398	left ventricle	LV	Zhao et al. (2023)
71	Regional radial strain (%)	Err_AHA_6	0.583605	left ventricle	LV	Zhao et al. (2023)
72	Regional radial strain (%)	Err_AHA_7	0.447783	left ventricle	LV	Zhao et al. (2023)
73	Regional radial strain (%)	Err_AHA_8	0.478996	left ventricle	LV	Zhao et al. (2023)
74	Regional radial strain (%)	Err_AHA_9	0.508827	left ventricle	LV	Zhao et al. (2023)
75	Regional radial strain (%)	Err_AHA_10	0.481199	left ventricle	LV	Zhao et al. (2023)
76	Regional radial strain (%)	Err_AHA_11	0.545166	left ventricle	LV	Zhao et al. (2023)
77	Regional radial strain (%)	Err_AHA_12	0.606392	left ventricle	LV	Zhao et al. (2023)
78	Regional radial strain (%)	Err_AHA_13	0.494542	left ventricle	LV	Zhao et al. (2023)
79	Regional radial strain (%)	Err_AHA_14	0.466408	left ventricle	LV	Zhao et al. (2023)
80	Regional radial strain (%)	Err_AHA_15	0.447443	left ventricle	LV	Zhao et al. (2023)
81	Regional radial strain (%)	Err_AHA_16	0.541549	left ventricle	LV	Zhao et al. (2023)
82	Global radial strain (%)	Err_global	0.610055	left ventricle	LV	Zhao et al. (2023)
