# Supplementary material for: Impact of systemic lupus erythematosus on cardiovascular morphologic and functional phenotypes: a Mendelian randomization analysis
Source: Front Cardiovasc Med. 2024 Oct 3;11:1454645. doi: 10.3389/fcvm.2024.1454645 (PMC11484247; doi:10.3389/fcvm.2024.1454645)
Supplement: Supplementary file 2 [file Table2.xlsx]

## Sheet: Supplementary Table S2
Supplementary Table S2.Information of included studies in exposure and outcome
	Traits	First author	Participants	Included studies	Number of SNPs
Exposures	Systemic lupus erythematosus	James Bentham	14,267 individuals (5,201 cases and 9,066 controls)	a newly conducted GWAS (4,036 cases and 6,959 controls), a meta-analysis (main GWAS and Hom et al. study (1,165 cases and 2,107 controls)) and a replication study	7071163
	Traits	First author	Participants	Included studies	Adjustments
Outcomes	Cardiovascular magnetic resonance traits	Zhao Bingxin	40,000 individuals (51% female)	UK Biobank (UKB) study,UKB Data-Field 100003	Age (at imaging), age-squared, sex, age-sex interaction, age-squared-sex interaction, imaging site, height, weight, and the top 40 genetic principal components
