# Supplementary material for: Impact of systemic lupus erythematosus on cardiovascular morphologic and functional phenotypes: a Mendelian randomization analysis
Source: Front Cardiovasc Med. 2024 Oct 3;11:1454645. doi: 10.3389/fcvm.2024.1454645 (PMC11484247; doi:10.3389/fcvm.2024.1454645)
Supplement: Supplementary file 3 [file Table3.xlsx]

## Sheet: Supplementary Table S3
Supplementary Table S3. SNPs used as instrumental variable for Systemic lupus erythematosus traits
exposure	pos.exposure	chr.exposure	pval.exposure	se.exposure	beta.exposure	SNP	effect_allele.exposure	other_allele.exposure	F-statistics
SLE	114303808	1	4.55e-13	0.0464854	0.336472	rs6679677	A	C	52.392
SLE	15229101	1	9.4e-11	0.0423755	0.274437	rs4661543	G	T	41.9426
SLE	173251856	1	1.65e-15	0.0309918	-0.24686	rs10912578	G	A	63.4465
SLE	183542323	1	1.81e-59	0.0498642	0.81093	rs17849501	T	C	264.478
SLE	161478810	1	6.64e-12	0.0289651	0.198851	rs6671847	A	G	47.1309
SLE	173314540	1	5.07e-11	0.0339693	0.223144	rs4916215	T	C	43.1516
SLE	183558174	1	1.37e-08	0.0578595	-0.328504	rs12094036	C	T	32.2353
SLE	113829869	2	1.65e-83	0.0290336	-0.562119	rs13019891	T	G	374.848
SLE	233288667	2	1.13e-42	0.0429292	0.587787	rs2573219	C	A	187.471
SLE	223961877	2	4.96e-09	0.0424835	-0.248461	rs10200680	T	C	34.2039
SLE	65654364	2	8.6e-09	0.0323703	0.18633	rs268124	T	C	33.1339
SLE	191939187	2	7.62e-09	0.045245	0.261365	rs2459611	T	C	33.3698
SLE	191958656	2	9.73e-66	0.0326791	-0.559616	rs4274624	T	C	293.251
SLE	213890232	2	2.04e-08	0.0412056	-0.231112	rs10048743	T	G	31.4581
SLE	40282854	2	4.08e-09	0.104778	-0.616186	rs34703115	C	T	34.5847
SLE	146601295	3	2.79e-16	0.0401497	-0.328504	rs1464446	T	G	66.9448
SLE	129084581	3	2.26e-36	0.0492727	0.620577	rs9852014	G	A	158.628
SLE	102743687	4	3.5e-10	0.027787	-0.174353	rs13136219	T	C	39.3709
SLE	149202268	5	7.11e-20	0.0781665	-0.71335	rs1078324	A	C	83.2845
SLE	133428601	5	3.71e-10	0.0603977	0.378436	rs4388254	T	C	39.2594
SLE	159879978	5	2.6e-14	0.0292964	-0.223144	rs2431697	C	T	58.0152
SLE	150457771	5	2.19e-18	0.03174	0.277632	rs6889239	C	T	76.5112
SLE	31940897	6	2.92e-102	0.0432319	0.928219	rs389884	G	A	460.991
SLE	106574794	6	3.11e-12	0.0296891	-0.207014	rs7768653	T	C	48.6189
SLE	31444187	6	2.48e-08	0.120793	-0.673345	rs12524498	T	G	31.0736
SLE	138243739	6	3.38e-18	0.0755941	0.65752	rs58721818	T	C	75.6558
SLE	31010047	6	2.66e-41	0.0689573	0.928219	rs150180633	T	C	181.193
SLE	31220203	6	3.27e-10	0.0613604	-0.385662	rs28361029	A	G	39.5037
SLE	128585616	7	1.86e-45	0.041539	0.587787	rs35000415	T	C	200.229
SLE	55511676	8	1.64e-34	0.0286208	-0.350657	rs7823055	T	G	150.107
SLE	63825561	10	4.19e-08	0.0332532	0.182322	rs7899626	T	C	30.0615
SLE	50025396	10	8.6e-11	0.0287118	-0.18633	rs7097397	A	G	42.1158
SLE	625085	11	2.97e-11	0.0335647	-0.223144	rs58688157	G	A	44.1982
SLE	35101738	11	2.93e-11	0.0280198	0.18633	rs353608	G	A	44.2217
SLE	5012503	12	9.11e-09	0.124134	-0.71335	rs73050535	T	C	33.0236
SLE	31276811	16	5.03e-48	0.0399866	0.582216	rs1143679	A	G	212.002
SLE	85966683	16	5.43e-17	0.0375683	-0.314711	rs13332649	G	A	70.1747
SLE	38007190	17	2.23e-08	0.0840342	0.470004	rs143123127	A	G	31.2817
SLE	10459969	19	3.61e-13	0.0324266	-0.235722	rs35251378	A	G	52.8442
SLE	55763262	19	4.4e-08	0.0574903	-0.314711	rs73068668	A	G	29.9664
SLE	21984379	22	2.88e-14	0.0345055	0.262364	rs3747093	A	G	57.8138
