# Supplementary material for: Impact of systemic lupus erythematosus on cardiovascular morphologic and functional phenotypes: a Mendelian randomization analysis
Source: Front Cardiovasc Med. 2024 Oct 3;11:1454645. doi: 10.3389/fcvm.2024.1454645 (PMC11484247; doi:10.3389/fcvm.2024.1454645)
Supplement: Supplementary file 4 [file Table4.xlsx]

## Sheet: Supplementary Table S4
Supplementary Table S4. SNPs excluded during the MR analyses
exposure	pos.exposure	chr.exposure	pval.exposure	se.exposure	beta.exposure	SNP	effect_allele.exposure	other_allele.exposure	excluded reason
SLE	32632457	6	1.28e-38	0.0351961	0.457425	rs9274357	T	C	incompatible alleles
SLE	11339965	8	4.83e-18	0.0320694	0.277632	rs2736332	C	G	being palindromic with intermediate allele frequencies
SLE	31351259	16	5.65e-36	0.0365295	0.457425	rs28834423	C	G	being palindromic with intermediate allele frequencies
SLE	111973358	12	3.51e-08	0.0294736	-0.162519	rs597808	G	A	high blood pressure (P=1.80e-28) Coronary artery disease (P=5.11e-26)
