# Supplementary material for: Impact of systemic lupus erythematosus on cardiovascular morphologic and functional phenotypes: a Mendelian randomization analysis
Source: Front Cardiovasc Med. 2024 Oct 3;11:1454645. doi: 10.3389/fcvm.2024.1454645 (PMC11484247; doi:10.3389/fcvm.2024.1454645)
Supplement: Supplementary file 5 [file Table5.xlsx]

## Sheet: Supplementary Table S5
Supplementary Table S5. MR analysis of all CMR traits in the discovery samples
				Inverse variance weighted				Weighted median				MR Egger				MR PRESSO
ID	outcome	Exposure	NO.SNP	Beta	LO_CI	UP_CI	P value	Beta	LO_CI	UP_CI	P value	Beta	LO_CI	UP_CI	P value	Outliers	Global Test Pvalue	Causal_Estimate	Sd	T-stat	P value	Distortion test, P value
1	LVEDV	SLE	41	0.006	-0.001	0.013	0.066	0.005	-0.004	0.015	0.686	0.002	-0.01	0.016	0.261		0.889	NA	NA	NA	NA	NA
2	LVESV	SLE	41	0.002	-0.005	0.009	0.589	0.001	-0.008	0.011	0.78	-0.007	-0.021	0.007	0.345		0.321333	NA	NA	NA	NA	NA
3	LVSV	SLE	41	0.007	0.001	0.015	0.045	0.005	-0.005	0.017	0.307	0.012	-0.002	0.028	0.114		0.387	NA	NA	NA	NA	NA
4	LVEF	SLE	40	0	0.008	0.009	0.539	0	-0.015	0.014	0.9	0.001	-0.01	0.012	0.072	1	0.001	0.004	0.005	0.844	0.403	0.8
5	LVCO	SLE	41	0.003	-0.004	0.011	0.4	0.009	-0.003	0.021	0.138	0.136	-0.003	0.03	0.113		0.501	NA	NA	NA	NA	NA
6	LVM	SLE	41	0.002	-0.003	0.008	0.449	0.004	-0.007	0.008	0.91	-0.001	-0.012	0.012	0.998		0.257333	NA	NA	NA	NA	NA
7	RVEDV	SLE	41	0.006	0	0.012	0.06	0.007	-0.002	0.016	0.147	0.004	-0.008	0.017	0.466		0.727667	NA	NA	NA	NA	NA
8	RVESV	SLE	41	0.005	-0.001	0.011	0.109	0.004	-0.005	0.014	0.344	-0.001	-0.0147	0.013	0.833		0.312	NA	NA	NA	NA	NA
9	RVSV	SLE	41	0.005	-0.002	0.013	0.141	0.009	-0.005	0.017	0.349	0.009	-0.005	0.024	0.229		0.663333	NA	NA	NA	NA	NA
10	RVEF	SLE	41	-0.001	-0.009	0.008	0.871	0	-0.012	0.012	0.982	0.01	-0.007	0.029	0.251		0.142333	NA	NA	NA	NA	NA
11	WT_AHA_1	SLE	41	0	-0.008	0.009	0.987	-0.003	-0.015	0.009	0.611	0.007	-0.016	0.025	0.458		0.0426667	NA	NA	NA	NA	NA
12	WT_AHA_2	SLE	41	0.001	-0.007	0.01	0.751	0.002	-0.01	0.014	0.781	0.011	-0.006	0.029	0.217		0.313667	NA	NA	NA	NA	NA
13	WT_AHA_3	SLE	41	0.007	-0.001	0.015	0.103	0.005	-0.006	0.017	0.39	0.003	-0.015	0.021	0.736		0.937333	NA	NA	NA	NA	NA
14	WT_AHA_4	SLE	41	0.003	-0.004	0.012	0.337	-0.004	-0.015	0.006	0.449	-0.001	-0.017	0.016	0.969		0.184333	NA	NA	NA	NA	NA
15	WT_AHA_5	SLE	41	0.002	-0.005	0.01	0.452	-0.002	-0.014	0.009	0.73	-0.005	-0.022	0.01	0.503		0.183667	NA	NA	NA	NA	NA
16	WT_AHA_6	SLE	41	-0.001	-0.008	0.007	0.881	-0.009	-0.021	0.002	0.123	-0.005	-0.022	0.011	0.549		0.227667	NA	NA	NA	NA	NA
17	WT_AHA_7	SLE	41	-0.001	-0.007	0.006	0.942	-0.002	-0.012	0.009	0.758	0	-0.014	0.014	0.993		0.532667	NA	NA	NA	NA	NA
18	WT_AHA_8	SLE	41	0.001	-0.005	0.008	0.632	-0.002	-0.012	0.008	0.74	-0.004	-0.018	0.01	0.599		0.795333	NA	NA	NA	NA	NA
19	WT_AHA_9	SLE	41	-0.002	-0.01	0.005	0.606	-0.004	-0.015	0.006	0.414	-0.003	-0.019	0.013	0.698		0.0886667	NA	NA	NA	NA	NA
20	WT_AHA_10	SLE	41	0	-0.007	0.007	0.953	-0.002	-0.011	0.007	0.731	0.001	-0.014	0.016	0.891		0.243	NA	NA	NA	NA	NA
21	WT_AHA_11	SLE	41	-0.002	-0.009	0.004	0.482	-0.005	-0.015	0.005	0.35	-0.002	-0.016	0.012	0.814		0.365667	NA	NA	NA	NA	NA
22	WT_AHA_12	SLE	41	-0.001	-0.007	0.006	0.818	-0.007	-0.017	0.003	0.217	0.004	-0.011	0.018	0.568		0.305	NA	NA	NA	NA	NA
23	WT_AHA_13	SLE	41	0	-0.007	0.007	0.899	-0.004	-0.014	0.007	0.558	-0.007	-0.022	0.008	0.402		0.632333	NA	NA	NA	NA	NA
24	WT_AHA_14	SLE	41	0	-0.007	0.007	0.882	-0.005	-0.016	0.006	0.449	-0.001	-0.018	0.016	0.969		0.435667	NA	NA	NA	NA	NA
25	WT_AHA_15	SLE	41	-0.002	-0.01	0.005	0.581	-0.002	-0.013	0.008	0.711	0.002	-0.013	0.017	0.736		0.505	NA	NA	NA	NA	NA
26	WT_AHA_16	SLE	41	-0.006	-0.013	0.001	0.146	-0.005	-0.015	0.006	0.429	-0.002	-0.017	0.013	0.817		0.725333	NA	NA	NA	NA	NA
27	WT_global	SLE	41	0.001	-0.006	0.008	0.732	-0.003	-0.013	0.008	0.662	-0.002	-0.017	0.013	0.878		0.104333	NA	NA	NA	NA	NA
28	LAV_max	SLE	41	0.001	-0.007	0.01	0.682	0.007	-0.006	0.02	0.245	0.016	-0.002	0.035	0.075		0.303667	NA	NA	NA	NA	NA
29	LAV_min	SLE	41	0.003	-0.006	0.012	0.442	-0.002	-0.015	0.011	0.804	0.01	-0.009	0.029	0.292		0.604667	NA	NA	NA	NA	NA
30	LASV	SLE	41	0.003	-0.006	0.013	0.435	0.011	-0.002	0.024	0.074	0.029	0.011	0.047	0.003		0.052	NA	NA	NA	NA	NA
31	LAEF	SLE	41	-0.001	-0.01	0.008	0.889	-0.004	-0.017	0.009	0.599	0.012	-0.007	0.032	0.204		0.855	NA	NA	NA	NA	NA
32	RAV_max	SLE	41	0.005	-0.004	0.013	0.232	0.006	-0.006	0.018	0.323	0.003	-0.014	0.021	0.688		0.533333	NA	NA	NA	NA	NA
33	RAV_min	SLE	41	0.006	-0.003	0.015	0.163	0.004	-0.008	0.017	0.433	0.002	-0.016	0.021	0.767		0.121333	NA	NA	NA	NA	NA
34	RASV	SLE	41	0.001	-0.008	0.01	0.823	0.002	-0.011	0.016	0.677	0	-0.018	0.019	0.959		0.529667	NA	NA	NA	NA	NA
35	RAEF	SLE	41	-0.006	-0.015	0.003	0.229	0.001	-0.013	0.015	0.827	0	-0.023	0.024	0.98		0.00366667	NA	NA	NA	NA	NA
36	AAo_max_area	SLE	40	-0.002	-0.012	0.008	0.76	-0.002	-0.015	0.011	0.832	-0.02	-0.038	-0.001	0.057	1	0.000333333	0.00159986	0.00503535	0.317726	0.752388	0.134667
37	AAo_min_area	SLE	40	-0.003	-0.013	0.007	0.628	-0.002	-0.015	0.011	0.776	-0.021	-0.04	-0.001	0.049	2	0.000333333	-0.000848793	0.00475184	-0.178624	0.859182	0.979667
38	AAo_aortic_distensibility	SLE	41	0.003	-0.005	0.011	0.437	0.007	-0.005	0.02	0.229	0.012	-0.005	0.029	0.17		0.894333	NA	NA	NA	NA	NA
39	DAo_max_area	SLE	39	-0.002	-0.01	0.007	0.805	0	-0.012	0.012	0.985	-0.016	-0.034	0.002	0.092	2	0.00633333	-0.000551673	NA	NA	NA	0.34
40	DAo_min_area	SLE	40	0.004	-0.003	0.011	0.256	0	-0.011	0.012	0.914	0.001	-0.017	0.018	0.91	1	0.00766667	0.00448555	0.00398715	1.125	0.267464	0.709333
41	DAo_aortic_distensibility	SLE	41	-0.004	-0.013	0.004	0.392	-0.001	-0.013	0.012	0.974	0.005	-0.013	0.023	0.548		0.599667	NA	NA	NA	NA	NA
42	Ell_1	SLE	41	0	-0.01	0.01	0.873	0.001	-0.014	0.016	0.846	0.001	-0.02	0.022	0.889		0.127	NA	NA	NA	NA	NA
43	Ell_2	SLE	41	-0.001	-0.011	0.009	0.938	-0.001	-0.015	0.012	0.924	0	-0.021	0.021	0.949		0.185	NA	NA	NA	NA	NA
44	Ell_3	SLE	41	0.006	-0.002	0.014	0.104	0.002	-0.01	0.014	0.668	0.004	-0.013	0.021	0.621		0.218	NA	NA	NA	NA	NA
45	Ell_4	SLE	41	-0.002	-0.012	0.007	0.694	-0.003	-0.017	0.011	0.73	0.001	-0.019	0.021	0.915		0.147333	NA	NA	NA	NA	NA
46	Ell_5	SLE	41	-0.003	-0.013	0.006	0.57	-0.008	-0.022	0.006	0.281	-0.004	-0.024	0.016	0.729		0.301667	NA	NA	NA	NA	NA
47	Ell_6	SLE	41	0	-0.01	0.01	0.891	-0.004	-0.018	0.011	0.679	-0.005	-0.026	0.016	0.661		0.0736667	NA	NA	NA	NA	NA
48	Ell_global	SLE	41	-0.001	-0.01	0.007	0.828	0.001	-0.012	0.015	0.797	-0.002	-0.02	0.016	0.865		0.316	NA	NA	NA	NA	NA
49	Ecc_AHA_1	SLE	41	0.002	-0.007	0.011	0.59	0.005	-0.008	0.018	0.435	0.004	-0.014	0.023	0.622		0.365667	NA	NA	NA	NA	NA
50	Ecc_AHA_2	SLE	41	-0.004	-0.012	0.005	0.467	-0.006	-0.018	0.006	0.366	-0.006	-0.018	0.006	0.202	1	0.027	-0.00150822	0.00425982	-0.354056	0.725204	0.341667
51	Ecc_AHA_3	SLE	41	0.008	-0.002	0.018	0.1	0.015	0.001	0.029	0.025	0.002	-0.019	0.023	0.842		0.0876667	NA	NA	NA	NA	NA
52	Ecc_AHA_4	SLE	41	-0.003	-0.012	0.007	0.649	-0.004	-0.018	0.01	0.597	0.002	-0.017	0.022	0.792		0.548667	NA	NA	NA	NA	NA
53	Ecc_AHA_5	SLE	41	-0.003	-0.012	0.007	0.669	0.001	-0.014	0.015	0.197	-0.013	-0.032	0.006	0.88		0.291667	NA	NA	NA	NA	NA
54	Ecc_AHA_6	SLE	41	0.007	-0.003	0.017	0.128	0.008	-0.007	0.023	0.265	-0.002	-0.022	0.019	0.916		0.212333	NA	NA	NA	NA	NA
55	Ecc_AHA_7	SLE	41	0.003	-0.007	0.012	0.51	0	-0.014	0.015	0.925	-0.017	-0.035	0.002	0.099		0.016	NA	NA	NA	NA	NA
56	Ecc_AHA_8	SLE	41	-0.005	-0.013	0.004	0.358	-0.003	-0.016	0.01	0.685	-0.016	-0.033	0.002	0.106		0.0333333	NA	NA	NA	NA	NA
57	Ecc_AHA_9	SLE	41	0.013	0.005	0.022	0.002	0.012	0	0.025	0.059	0.003	-0.019	0.025	0.793		0.02	NA	NA	NA	NA	NA
58	Ecc_AHA_10	SLE	41	0.006	-0.003	0.015	0.144	0.005	-0.008	0.019	0.409	-0.003	-0.022	0.016	0.798		0.778667	NA	NA	NA	NA	NA
59	Ecc_AHA_11	SLE	41	0	-0.009	0.009	0.961	-0.004	-0.017	0.009	0.579	-0.005	-0.023	0.013	0.634		0.948333	NA	NA	NA	NA	NA
60	Ecc_AHA_12	SLE	41	0.009	0.001	0.018	0.043	0.005	-0.008	0.018	0.399	0.003	-0.002	0.016	0.791		0.671	NA	NA	NA	NA	NA
61	Ecc_AHA_13	SLE	41	0	-0.008	0.008	0.928	-0.001	-0.013	0.012	0.997	-0.019	-0.038	0.001	0.075		0.008	NA	NA	NA	NA	NA
62	Ecc_AHA_14	SLE	38	0.013	0.003	0.023	0.006	0.007	-0.008	0.023	0.314	-0.006	-0.029	0.015	0.555	1	0.034	0.00885099	0.00504718	1.75365	0.0873472	0.475
63	Ecc_AHA_15	SLE	41	0.007	-0.002	0.017	0.086	0.007	-0.007	0.021	0.3	-0.01	-0.033	0.013	0.426		0.00433333	NA	NA	NA	NA	NA
64	Ecc_AHA_16	SLE	41	0.006	-0.003	0.015	0.178	0.005	-0.009	0.019	0.436	-0.011	-0.029	0.008	0.289		0.489333	NA	NA	NA	NA	NA
65	Ecc_global	SLE	39	0.01	0.002	0.019	0.022	0.005	-0.009	0.019	0.43	-0.009	-0.029	0.012	0.436		0.135667	NA	NA	NA	NA	NA
66	Err_AHA_1	SLE	41	0	-0.009	0.009	0.957	-0.007	-0.021	0.007	0.363	-0.001	-0.024	0.023	0.989		0.014	NA	NA	NA	NA	NA
67	Err_AHA_2	SLE	41	-0.005	-0.014	0.004	0.29	-0.003	-0.016	0.011	0.756	0.001	-0.018	0.02	0.898		0.0906667	NA	NA	NA	NA	NA
68	Err_AHA_3	SLE	41	0.006	-0.003	0.015	0.142	0.009	-0.004	0.023	0.142	0.01	-0.009	0.029	0.28		0.443333	NA	NA	NA	NA	NA
69	Err_AHA_4	SLE	41	0.002	-0.007	0.012	0.558	-0.001	-0.015	0.013	0.923	0.014	-0.007	0.035	0.182		0.112667	NA	NA	NA	NA	NA
70	Err_AHA_5	SLE	41	-0.002	-0.011	0.008	0.826	-0.006	-0.019	0.008	0.46	-0.003	-0.023	0.018	0.822		0.072	NA	NA	NA	NA	NA
71	Err_AHA_6	SLE	41	-0.004	-0.013	0.005	0.454	-0.006	-0.019	0.008	0.432	-0.012	-0.03	0.007	0.242		0.478	NA	NA	NA	NA	NA
72	Err_AHA_7	SLE	41	-0.007	-0.015	0.002	0.184	-0.014	-0.027	-0.001	0.04	-0.003	-0.021	0.016	0.829		0.545667	NA	NA	NA	NA	NA
73	Err_AHA_8	SLE	41	-0.007	-0.015	0.002	0.184	-0.014	-0.027	-0.001	0.046	-0.003	-0.021	0.016	0.829		0.546667	NA	NA	NA	NA	NA
74	Err_AHA_9	SLE	41	-0.001	-0.01	0.008	0.86	-0.008	-0.021	0.006	0.29	0.013	-0.006	0.032	0.172		0.549667	NA	NA	NA	NA	NA
75	Err_AHA_10	SLE	41	-0.007	-0.016	0.003	0.182	-0.004	-0.018	0.009	0.577	0.003	-0.017	0.022	0.752		0.0366667	NA	NA	NA	NA	NA
76	Err_AHA_11	SLE	41	-0.01	-0.019	-0.002	0.017	-0.009	-0.022	0.004	0.205	-0.006	-0.024	0.012	0.528		0.787	NA	NA	NA	NA	NA
77	Err_AHA_12	SLE	41	-0.006	-0.015	0.003	0.201	-0.009	-0.022	0.004	0.869	-0.006	-0.024	0.012	0.366		0.499	NA	NA	NA	NA	NA
78	Err_AHA_13	SLE	41	0.004	-0.005	0.013	0.333	-0.002	-0.015	0.012	0.869	0.008	-0.01	0.027	0.366		0.556333	NA	NA	NA	NA	NA
79	Err_AHA_14	SLE	41	0.006	-0.003	0.016	0.14	0.006	-0.007	0.02	0.334	0.016	-0.003	0.035	0.104		0.872333	NA	NA	NA	NA	NA
80	Err_AHA_15	SLE	40	0.003	-0.008	0.014	0.56	-0.001	-0.016	0.014	0.909	-0.001	-0.025	0.024	0.957	1	0.0166667	0.00404863	0.00554759	0.729799	0.469874	0.142333
81	Err_AHA_16	SLE	41	0	-0.009	0.009	0.847	-0.003	-0.016	0.009	0.642	0.004	-0.015	0.023	0.648		0.636667	NA	NA	NA	NA	NA
82	Err_global	SLE	41	0	-0.009	0.009	0.888	0	-0.012	0.013	0.894	0.008	-0.01	0.026	0.372		0.457333	NA	NA	NA	NA	NA
